# Supplementary material for: Common germline polymorphisms associated with breast cancer-specific survival
Source: PubMed Central journal article supplement (PMC4484708; doi:10.1186/s13058-015-0570-7), 2015-04-22
Supplement: 13058_2015_570_MOESM2_ESM.pdf [file 13058_2015_570_MOESM2_ESM.pdf]

**Additional File 2 - Samples included in meta-analysis by study [Guo, Schmidt, Pharoah et al, under review]**

| Study        | All Cases                |              | ER positive              |              | ER negative              |              |
|--------------|--------------------------|--------------|--------------------------|--------------|--------------------------|--------------|
|              | N (breast cancer deaths) | Person-years | N (breast cancer deaths) | Person-years | N (breast cancer deaths) | Person-years |
| COGS         | 29 360 (1790)            | 128 552      | 20 605 (942)             | 89 702       | 4926 (558)               | 21 437       |
| CGEMS        | 1145 (93)                | 7711         | --                       | --           | --                       | --           |
| SASBAC       | 787 (69)                 | 3739         | 483 (44)                 | 2294         | 108 (9)                  | 502          |
| UK2          | 2763 (233)               | 23 112       | --                       | --           |                          |              |
| Metabric     | 369 (86)                 | 1570         | 291 (59)                 | 1268         | 63 (25)                  | 225          |
| PG-SNPs      | 1786 (204)               | 5820         | 1188 (116)               | 3916         | 586 (87)                 | 1888         |
| HEBCS        | 742 (285)                | 4666         | 492 (172)                | 3458         | 196 (101)                | 982          |
| BPC3-CPSII   | 293 (30)                 | 2544         | --                       | --           | 293 (30)                 | 2544         |
| BPC3-EPIC    | 476 (74)                 | 2226         | --                       | --           | 476 (74)                 | 2226         |
| BPC3-NHS2    | 233 (36)                 | 2732         | --                       | --           | 233 (36)                 | 2732         |
| <b>Total</b> | <b>37 954 (2900)</b>     |              | <b>23 059 (1333)</b>     |              | <b>6881 (920)</b>        |              |
