# Supplementary material for: Common germline polymorphisms associated with breast cancer-specific survival
Source: PubMed Central journal article supplement (PMC4484708; doi:10.1186/s13058-015-0570-7), 2015-04-22
Supplement: 13058_2015_570_MOESM4_ESM.pdf [file 13058_2015_570_MOESM4_ESM.pdf]

#### Additional File 4 - Look up of previously reported associations in meta-analysis.

| SNP        | Gene                | Published                                                        | Model                   | Effect Allele | Effect Allele Freq | HR (90% CI)                | One-sided p-value |
|------------|---------------------|------------------------------------------------------------------|-------------------------|---------------|--------------------|----------------------------|-------------------|
| rs2981582  | <i>FGFR2</i>        | Bayraktar et al (2013)                                           | Dominance               | G             | 0.57               | 1.09 ( <b>1.04</b> – 1.14) | <b>0.00085</b>    |
| rs1800566  | <i>NQO1</i>         | Fagerholm et al (2008)                                           | Dominance               | A             | 0.19               | 1.10 ( <b>1.03</b> -1.17 ) | <b>0.0046</b>     |
| rs9934948  | <i>LOC100506172</i> | Shu et al (2012) (GWAS)                                          | Co-dominance            | T             | 0.15               | 0.92 (0.86 - <b>0.98</b> ) | <b>0.011</b>      |
| rs1800470  | <i>TGF</i>          | Shu et al (2004)                                                 | Co-dominance            | A             | 0.61               | 0.95 (0.91 - <b>0.99</b> ) | <b>0.030</b>      |
| rs3775775  | <i>SULT1E1</i>      | Choi et al (2005)                                                | Dominance               | G             | 0.09               | 1.08 ( <b>1.00</b> -1.16 ) | <b>0.046</b>      |
| rs731236   | <i>VDR</i>          | Perna et al (2013)                                               | Co-dominance            | G             | 0.39               | 1.04 ( <b>1.00</b> – 1.08) | 0.056             |
| rs10477313 | <i>PPP2R2B</i>      | Jamshidi et al (2013)                                            | Dominance               | T             | 0.12               | 0.94 (0.87 - <b>1.01</b> ) | 0.081             |
| rs700519   | <i>CYP19A1</i>      | Long et al (2006)                                                | Dominance               | A             | 0.03               | 1.10 ( <b>0.98</b> – 1.22) | 0.093             |
| rs16949649 | <i>NME1</i>         | Qu et al (2008)                                                  | Dominance               | C             | 0.39               | 1.03 ( <b>0.99</b> – 1.07) | 0.11              |
| rs4251864  | <i>PLAUR</i>        | Pande et al (2013)                                               | Co-dominance            | G             | 0.10               | 1.04 ( <b>0.96</b> – 1.12) | 0.20              |
| rs2333227  | <i>MPO</i>          | Ambrosone et al (2005)                                           | Dominance               | T             | 0.21               | 1.03 ( <b>0.97</b> – 1.09) | 0.20              |
| rs8136803  | <i>TIMP3</i>        | Peterson et al (2009)                                            | Co-dominance            | T             | 0.07               | 1.03 ( <b>0.95</b> – 1.11) | 0.25              |
| rs1805386  | <i>LIG4</i>         | Goode et al (2002)                                               | Dominance               | G             | 0.18               | 1.02 ( <b>0.97</b> – 1.07) | 0.25              |
| rs1800795  | <i>IL6</i>          | DeMichele et al (2003)                                           | Dominance               | G             | 0.56               | 1.02 ( <b>0.97</b> – 1.07) | 0.26              |
| rs25487    | <i>XRCC1</i>        | Bewick et al (2006), Castro et al (2013)                         | Co-dominance, dominance | C             | 0.65               | 0.98 (0.93 - <b>1.03</b> ) | 0.27              |
| rs2010963  | <i>VEGF</i>         | Lu et al (2005)                                                  | Co-dominance            | G             | 0.69               | 1.02 ( <b>0.97</b> – 1.07) | 0.27              |
| rs2302254  | <i>NME1</i>         | Qu et al (2008)                                                  | Dominance               | T             | 0.19               | 1.02 ( <b>0.96</b> – 1.08) | 0.27              |
| rs11536889 | <i>TLR4</i>         | Yang et al (2013)                                                | Co-dominance            | C             | 0.14               | 1.03 ( <b>0.95</b> – 1.11) | 0.28              |
| rs11225395 | <i>MMP8</i>         | Decock et al (2007), Beeghly-Fadiel et al (2012)                 | Dominance, co-dominance | G             | 0.56               | 1.02 ( <b>0.97</b> – 1.07) | 0.29              |
| rs1042522  | <i>TP53</i>         | Schmidt et al (2009), Toyama et al (2007), Tommiska et al (2005) | Dominance               | C             | 0.74               | 1.02 ( <b>0.95</b> – 1.09) | 0.31              |
| rs5361     | <i>SELE</i>         | Kontogianni et al (2013)                                         | Dominance               | G             | 0.10               | 0.98 (0.91 - <b>1.05</b> ) | 0.32              |
| rs2479717  | <i>CCND3</i>        | Azzato et al (2008)                                              | Co-dominance            | A             | 0.74               | 0.98 (0.92 - <b>1.04</b> ) | 0.32              |

Hazard ratios, confidence intervals and p-values are from a co-dominant model.

P-values refer to a one-sided test of association in the direction indicated in blue in the 90% CI of the HR.

**Additional File 4 - Continued.**

| SNP        | Gene           | Published                                    | Model        | Effect Allele | Effect Allele Freq | HR (90% CI)        | One-sided p-value |
|------------|----------------|----------------------------------------------|--------------|---------------|--------------------|--------------------|-------------------|
| rs13181    | <i>ERCC2</i>   | Bewick et al (2011)                          | Dominance    | G             | 0.37               | 1.01 (0.97 – 1.05) | 0.35              |
| rs11225297 | <i>MMP7</i>    | Beeghly-Fadiel et al (2009,2012)             | Co-dominance | T             | 0.12               | 0.98 (0.91 - 1.05) | 0.35              |
| rs13347    | <i>CD44</i>    | Jiang et al (2012)                           | Co-dominance | T             | 0.20               | 1.01 (0.96 – 1.06) | 0.35              |
| rs3218536  | <i>XRCC2</i>   | Lin et al (2011)                             | Co-dominance | T             | 0.08               | 1.02 (0.94 – 1.10) | 0.36              |
| rs6504950  | <i>COX11</i>   | Bayraktar et al (2013)                       | Dominance    | A             | 0.27               | 1.01 (0.96 – 1.06) | 0.38              |
| rs2364725  | <i>NRF2</i>    | Hartikainen et al (2012)                     | Dominance    | T             | 0.51               | 1.01 (0.96 – 1.06) | 0.39              |
| rs1902586  | <i>CYP19A1</i> | Long et al (2006)                            | Dominance    | A             | 0.05               | 1.01 (0.91 – 1.11) | 0.44              |
| rs11185659 | <i>RXRA</i>    | Pande et al (2013)                           | Co-dominance | T             | 0.21               | 1.00 (0.94 – 1.06) | 0.47              |
| rs12900137 | <i>CYP19A1</i> | Long et al (2006)                            | Dominance    | C             | 0.05               | 1.00 (0.91 – 1.09) | 0.47              |
| rs28566535 | <i>CYP19A1</i> | Long et al (2006)                            | Dominance    | C             | 0.05               | 1.00 (0.90 – 1.10) | 0.51              |
| rs1029946  | <i>PRKAG2</i>  | Jamshidi et al (2013)                        | Dominance    | G             | 0.12               | 1.00 (0.93- 1.07)  | 0.52              |
| rs7867504  | <i>SLC28A3</i> | Lee et al (2013)                             | Dominance    | C             | 0.30               | 1.00 (0.95 – 1.05) | 0.53              |
| rs881658   | <i>RXRA</i>    | Pande et al (2013)                           | Co-dominance | T             | 0.30               | 1.00 (0.94 – 1.06) | 0.54              |
| rs881657   | <i>RXRA</i>    | Pande et al (2013)                           | Co-dominance | G             | 0.29               | 0.99 (0.94 – 1.04) | 0.56              |
| rs1695     | <i>GSTP1</i>   | Sweeney et al (2000),<br>Duggan et al (2013) | Co-dominance | G             | 0.33               | 1.00 (0.95 – 1.05) | 0.57              |
| rs1801131  | <i>MTHFR</i>   | Martin et al (2006)                          | Dominance    | G             | 0.32               | 0.99 (0.94 – 1.04) | 0.62              |
| rs7864987  | <i>RXRA</i>    | Pande et al (2013)                           | Co-dominance | C             | 0.25               | 0.99 (0.93 – 1.05) | 0.64              |
| rs10881583 | <i>RXRA</i>    | Pande et al (2013)                           | Co-dominance | C             | 0.25               | 1.02 (0.96 - 1.08) | 0.66              |
| rs2070744  | <i>eNOS</i>    | Choi et al (2006)                            | Dominance    | T             | 0.62               | 1.01 (0.96 - 1.06) | 0.67              |
| rs730154   | <i>CYP19A1</i> | Long et al (2006)                            | Dominance    | C             | 0.15               | 0.98 (0.92 – 1.04) | 0.67              |
| rs936306   | <i>CYP19A1</i> | Long et al (2006)                            | Dominance    | T             | 0.15               | 0.98 (0.92 – 1.04) | 0.70              |
| rs1800872  | <i>IL10</i>    | Gerger et al (2010)                          | Dominance    | G             | 0.77               | 1.02 (0.97 - 1.07) | 0.72              |
| rs3741378  | <i>SIPA1</i>   | Pei et al (2013)                             | Dominance    | T             | 0.13               | 0.97 (0.91 – 1.03) | 0.76              |
| rs3784099  | <i>RAD51B</i>  | Shu et al (2012) (GWAS)                      | Co-dominance | A             | 0.29               | 0.98 (0.93 – 1.03) | 0.77              |

Hazard ratios, confidence intervals and p-values are from a co-dominant model.

P-values refer to a one-sided test of association in the direction indicated in blue in the 90% CI of the HR.

**Additional File 4 - Continued.**

| SNP        | Gene           | Published                                | Model                   | Effect Allele | Effect Allele Freq | HR (90% CI)                | One-sided p-value |
|------------|----------------|------------------------------------------|-------------------------|---------------|--------------------|----------------------------|-------------------|
| rs861539   | <i>XRCC3</i>   | Bewick et al (2006), Castro et al (2013) | Co-dominance, dominance | A             | 0.37               | 0.98 ( <b>0.93</b> – 1.03) | 0.79              |
| rs11639960 | <i>MMP2</i>    | Slattery et al (2013)                    | Dominance               | G             | 0.35               | 1.03 ( 0.98- <b>1.08</b> ) | 0.86              |
| rs10046    | <i>CYP19A1</i> | Fasching et al (2008)                    | Dominance               | A             | 0.54               | 0.97 ( <b>0.93</b> – 1.01) | 0.86              |
| rs7121     | <i>GNAS1</i>   | Otterbach et al (2006)                   | Co-dominance            | T             | 0.47               | 0.96 ( <b>0.91</b> – 1.01) | 0.88              |
| rs251864   | <i>ZFP36</i>   | Upadhyay et al (2012)                    | Co-dominance            | G             | 0.31               | 0.95 ( <b>0.90</b> – 1.00) | 0.93              |
| rs243836   | <i>MMP2</i>    | Slattery et al (2013)                    | Co-dominance            | A             | 0.48               | 0.95 ( <b>0.90</b> – 1.00) | 0.98              |
| rs12508721 | <i>IL21</i>    | You et al (2013)                         | Co-dominance            | T             | 0.26               | 1.07 (1.02 - <b>1.12</b> ) | 0.98              |
| rs1992116  | <i>MMP2</i>    | Slattery et al (2013)                    | Dominance               | A             | 0.44               | 1.06 (1.01 - <b>1.11</b> ) | 0.99              |
| rs4646903  | <i>CYP1A1</i>  | Long et al (2007)                        | Dominance               | G             | 0.10               | 0.89 ( <b>0.83</b> – 0.95) | 0.99              |
| rs1477017  | <i>MMP2</i>    | Slattery et al (2013)                    | Dominance               | G             | 0.36               | 1.07 (1.02 - <b>1.12</b> ) | 0.99              |

Hazard ratios, confidence intervals and p-values are from a co-dominant model.

P-values refer to a one-sided test of association in the direction indicated in blue in the 90% CI of the HR.
